# Supplementary material
Source: PubMed Central journal article supplement (PMC4213586)

## *Supplementary Materials*

# **Avian scavengers and the threat from veterinary pharmaceuticals**

**Richard J. Cuthbert<sup>1,2</sup>, Mark A. Taggart<sup>3</sup>, Vibhu Prakash<sup>4</sup>, Soumya S. Chakraborty<sup>4</sup>, Parag Deori<sup>4</sup>, Toby Galligan<sup>1</sup>, Mandar Kulkarni<sup>4</sup>, Sachin Ranade<sup>4</sup>, Mohini Saini<sup>5</sup>, Anil Kumar Sharma<sup>5</sup>, Rohan Shringarpure<sup>4</sup> and Rhys E. Green<sup>1,6,\*</sup>**

<sup>1</sup>Royal Society for the Protection of Birds, The Lodge, Sandy, Bedfordshire, SG19 2DL, UK

<sup>2</sup>Wildlife Conservation Society, PO Box 277, Goroka, Eastern Highlands Province, Papua New Guinea

<sup>3</sup>Environmental Research Institute, University of the Highlands and Islands, Thurso, KW14 7JD, UK

<sup>4</sup>Bombay Natural History Society, Hornbill House, S.B. Singh Road, Mumbai, 400 001, India

<sup>5</sup>Indian Veterinary Research Institute, Izatnagar, 243 122, Uttar Pradesh, India

<sup>6</sup>Conservation Science Group, Department of Zoology, University of Cambridge, Downing St, Cambridge, CB2 3EJ, UK

**\*Author for correspondence:** Rhys E. Green; E-mail: r.green@zoo.cam.ac.uk; Tel: 00 44 1223 762840; Fax: 00 44 1223 336676

## **Supplementary Methods**

### *Veterinary surveys*

All interviews with veterinary practitioners in India followed a set and structured format. Interviews sought information on the species of animal treated (categorical yes/no data for a prescribed list of species); information on the relative proportion of "poor", "medium", "commercial" and "other" types of farmers seeking treatment; a list of which NSAID compounds each practice used; a list of conditions treated with NSAIDs; quantitative data on the dose, caseload, number of NSAID prescriptions per month and year of first use of each NSAID. The information was provided verbally and from memory and working knowledge of the veterinarians questioned. Where a range of values were reported for a specific question we used the mid-point of the range as a point estimate. Information on which species suffered from side effects was not requested. However, the majority of domesticated livestock treated by these practices were cattle, buffalo and goats and side effects were likely to have been predominantly observed in these species.

**Table S1.** Numbers and span of collection dates of liver samples from domesticated ungulates analysed for diclofenac and meloxicam by site-cluster.

| Cluster | States                       | Diclofenac  |          |                        |             | Meloxicam   |          |                        |             |
|---------|------------------------------|-------------|----------|------------------------|-------------|-------------|----------|------------------------|-------------|
|         |                              | No. samples | No. >LOQ | 1 <sup>st</sup> sample | Last sample | No. samples | No. >LOQ | 1 <sup>st</sup> sample | Last sample |
| 1       | Gujarat                      | 447         | 18       | May 2004               | Dec 2007    | 381         | 7        | Jun 2006               | Dec 2007    |
| 2       | Maharashtra                  | 900         | 57       | Sept 2004              | Jun 2010    | 711         | 38       | Sept 2006              | Jun 2010    |
| 3       | Rajasthan                    | 706         | 114      | Jul 2004               | Jun 2010    | 547         | 24       | Aug 2006               | Jun 2010    |
| 4       | Rajasthan                    | 811         | 96       | Jul 2004               | Jun 2010    | 661         | 55       | Aug 2006               | Jun 2010    |
| 5       | Jammu & Kashmir, Punjab      | 422         | 12       | Jan 2005               | Feb 2010    | 332         | 22       | Nov 2006               | Feb 2010    |
| 6       | Punjab, Haryana              | 389         | 54       | Feb 2005               | Jul 2010    | 326         | 36       | Dec 2006               | Jul 2010    |
| 7       | Madhya Pradesh               | 757         | 57       | Feb 2005               | Jun 2010    | 582         | 39       | Apr 2006               | Jun 2010    |
| 8       | Uttar Pradesh                | 585         | 38       | Jul 2004               | May 2010    | 305         | 9        | May 2008               | May 2010    |
| 9       | Andhra Pradesh               | 460         | 6        | Apr 2005               | Jul 2010    | 306         | 5        | Mar 2008               | Jul 2010    |
| 10      | Madhya Pradesh, Maharashtra  | 166         | 14       | Feb 2005               | Jul 2010    | 141         | 7        | May 2006               | Jul 2010    |
| 11      | West Bengal, Jharkand, Bihar | 564         | 58       | Apr 2005               | Sept 2009   | 346         | 22       | Jun 2006               | Sept 2009   |
| All     | All                          | 6207        | 524      |                        |             | 4638        | 264      |                        |             |

**Figure S1.** Smoothed curves representing changes over time in the arithmetic mean concentration ( $\text{mg kg}^{-1}$  wet weight) of diclofenac in liver samples from domesticated ungulates between 2004 and 2010 for eleven site-clusters, indicated by numerals adjacent to the curves. Curves are shown for periods that include the central 80% of sample collection dates for each site-cluster.

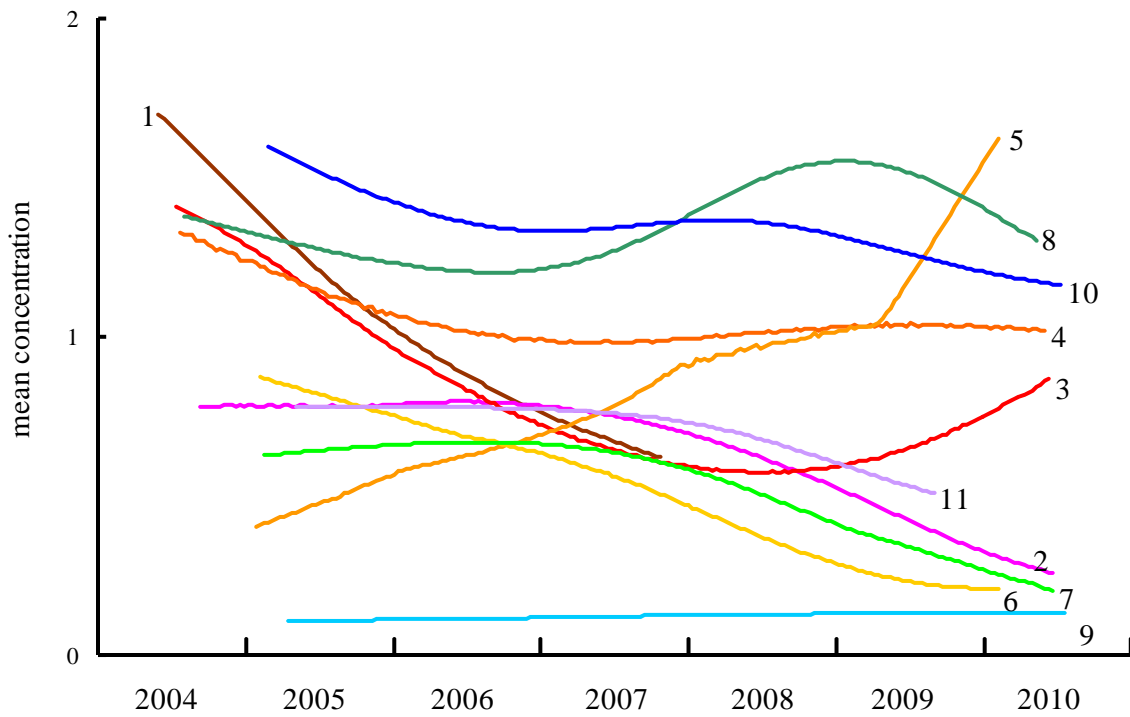

**Figure S2.** Smoothed curves representing changes over time in the arithmetic mean concentration ( $\text{mg kg}^{-1}$  wet weight) of meloxicam in liver samples from domesticated ungulates between 2006 and 2010 for eleven site-clusters, indicated by numerals adjacent to the curves. Curves are shown for periods that include the central 80% of sample collection dates for each site-cluster.

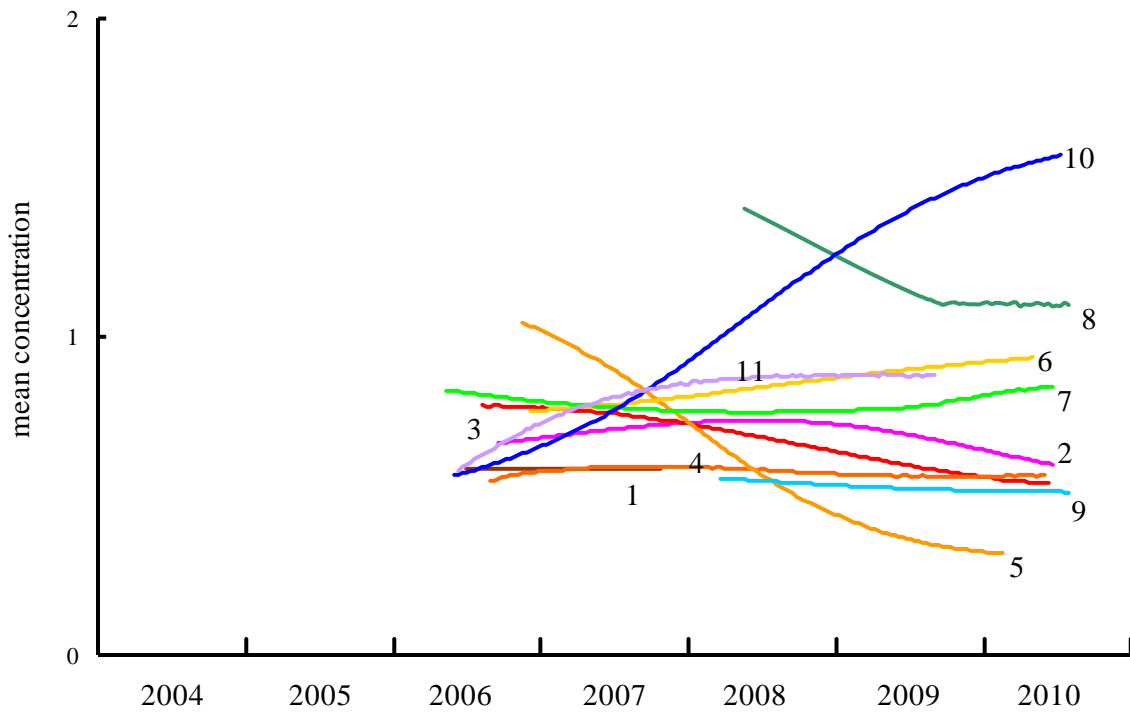

Supplement: rstb20130574supp1.pdf [file rstb20130574supp1.pdf]
